# Supplementary material for: Efficient engineering of chromosomal ribosome binding site libraries in mismatch repair proficient Escherichia coli
Source: PubMed Central journal article supplement (PMC5615074; doi:10.1038/s41598-017-12395-3), 2017-09-26
Supplement: 41598_2017_12395_MOESM1_ESM.pdf [file 41598_2017_12395_MOESM1_ESM.pdf]

**Efficient engineering of chromosomal ribosome binding site libraries in mismatch repair proficient *Escherichia coli***

Sabine Oesterle<sup>1</sup>, Daniel Gerngross<sup>1</sup>, Steven Schmitt<sup>1</sup>, Tania Michelle Roberts<sup>1</sup>, and Sven Panke<sup>1\*</sup>

*Supplementary material*

Supplementary Table 1: **Possible sources of bias leading to non-uniform distribution of library members.** Occurrence of biases depends on genetic configuration of the host strain (MMR<sup>-</sup> or MMR<sup>+</sup>) and the design strategy (N<sub>6</sub>-RedLibs or GLOS-RedLibs) for the supplied oligonucleotide pool during CRMAGE.

|                                                                                          | N <sub>6</sub> -RedLibs<br>(0-6 bp mismatch) |                  | GLOS-RedLibs<br>(6 bp mismatch) |
|------------------------------------------------------------------------------------------|----------------------------------------------|------------------|---------------------------------|
|                                                                                          | MMR <sup>-</sup>                             | MMR <sup>+</sup> | MMR <sup>+</sup>                |
| DNA synthesis-derived bias in oligonucleotide pool                                       | yes                                          | yes              | yes                             |
| AR efficiency bias due to                                                                |                                              |                  |                                 |
| - different length of the mismatch                                                       | yes                                          | yes              | no                              |
| - folding energy of the oligonucleotide                                                  | yes                                          | yes              | yes                             |
| - generation at which the oligonucleotide is integrated                                  | yes                                          | yes              | yes                             |
| CRISPR/Cas9 counterselection                                                             |                                              |                  |                                 |
| - inactivation due to mutation of the components                                         | yes                                          | no               | no                              |
| - bias in escape rate due to length and position of the mismatch between gRNA and target | yes                                          | yes              | no                              |
| MMR bias due to length or type of mismatch                                               | no                                           | yes              | no                              |
| Survival rate bias due to essentiality or metabolic burden                               | yes                                          | yes              | yes                             |

Supplementary Table 2: Strains and Plasmids used in this study.

| Strains                              | Relevant genotype                                                                                                                                                                                          | Source/reference                 |
|--------------------------------------|------------------------------------------------------------------------------------------------------------------------------------------------------------------------------------------------------------|----------------------------------|
| BW23474                              | <i>E. coli</i> $\Delta(\arg F-lac) 169, \Delta uidA4::pir-116, recA1, rpoS396(Am), endA9(\text{del-ins})::FRT, rph-1, hsdR514, rob-1, creC510$                                                             | 1                                |
| Top10                                | <i>E. coli</i> <i>F</i> - <i>mcrA</i> $\Delta(\text{mrr-hsdRMS-mcrBC}) \phi 80lacZ\Delta M15 \Delta lacX74 nupG recA1 araD139 \Delta(\text{ara-leu})7697 galE15 galK16 rpsL(\text{Str}^R) endA1 \lambda^-$ | Invitrogen                       |
| MG1655                               | <i>E. coli</i> <i>F</i> -, <i>lambda</i> -, <i>rph-1</i>                                                                                                                                                   | Coli Genetic Stock Center (CGSC) |
| EcNR1                                | <i>E. coli</i> MG1655 $\Delta(\text{ybhB-bioAB})::[\lambda cl857 N(\text{cro-ea59})::tetR-bla]$                                                                                                            | Addgene #26930 <sup>2</sup>      |
| Ec <sup>-</sup>                      | EcNR1 translational knockout of <i>mutS</i>                                                                                                                                                                | this study                       |
| Ec <sup>+</sup> LacZ_Red             | EcNR1 with a RBS variant (DDKGAG) for <i>lacZ</i>                                                                                                                                                          | this study                       |
| Ec <sup>-</sup> LacZ_Red             | Ec <sup>-</sup> with a RBS variant (DDKGAG) for <i>lacZ</i>                                                                                                                                                | this study                       |
| Ec <sup>+</sup> LacZ_GLOS            | EcNR1 with a RBS variant (BDGGGW) for <i>lacZ</i>                                                                                                                                                          | this study                       |
| Ec <sup>+</sup> ribA                 | EcNR1 with a RBS variant (VABRGA) for <i>ribA</i>                                                                                                                                                          | this study                       |
| Ec <sup>+</sup> ribB                 | EcNR1 with a RBS variant (AGRAVV) for <i>ribB</i> and deletion of the riboregulator of <i>ribB</i>                                                                                                         | this study                       |
| Ec <sup>+</sup> ribA <sub>exp</sub>  | EcNR1 with RBS variant (AACAGA) for <i>ribA</i> and (AGGACA) for <i>ribB</i> and deletion of the riboregulator of <i>ribB</i>                                                                              | this study                       |
| Ec <sup>+</sup> ribA <sub>pred</sub> | EcNR1 with RBS variant (GAGGGA) for <i>ribA</i> and (AGGAAC) for <i>ribB</i> and deletion of the riboregulator of <i>ribB</i>                                                                              | this study                       |
| Ec <sup>-</sup> ribAB                | Ec <sup>-</sup> with a RBS variant (AAGAGA) for <i>ribA</i> and (AGGACA) for <i>ribB</i> and deletion of the riboregulator of <i>ribB</i>                                                                  | this study                       |
| <b>Plasmids</b>                      |                                                                                                                                                                                                            |                                  |
| pCas9                                | Bacterial expression of Cas9 nuclease, chloramphenicol resistance, p15A ori                                                                                                                                | Addgene #42876 <sup>3</sup>      |
| pCRISPR                              | A crRNA expression plasmid for targeting a specific sequence of choice, kanamycin resistance, pBR322 ori                                                                                                   | Addgene #42875 <sup>3</sup>      |
| pCRISPR_lacZ                         | pCRISPR with gRNA targeting the RBS of <i>lacZ</i>                                                                                                                                                         | this study                       |
| pCRISPR_ribA                         | pCRISPR with gRNA targeting the RBS of <i>ribA</i>                                                                                                                                                         | this study                       |
| pCRISPR_ribB                         | pCRISPR with gRNA targeting the RBS of <i>ribB</i>                                                                                                                                                         | this study                       |
| pSEVA261                             | p15A ori and kanamycin resistance                                                                                                                                                                          | pSEVA collection <sup>4</sup>    |
| pAB92                                | pBR322 ori, ampicillin resistance gene, P <sub>tet</sub> , TetR                                                                                                                                            | 5                                |
| pSEVA261_P <sub>tet</sub>            | pSEVA261 with P <sub>tet</sub> and TetR                                                                                                                                                                    | this study                       |
| pSEVA261_mKate                       | pSEVA261_P <sub>tet</sub> plasmid with <i>mKate2</i> under control of a P <sub>tet</sub>                                                                                                                   | this study                       |
| pSEVA261_ribA                        | pSEVA261_P <sub>tet</sub> plasmid with <i>ribA</i> (EcoGene accession number: EG11331) and <i>mKate2</i> under control of a P <sub>tet</sub>                                                               | this study                       |
| pSEVA261_ribB                        | pSEVA261_P <sub>tet</sub> plasmid with <i>ribB</i> (EcoGene accession number: EG10465) and <i>mKate2</i> under control of a P <sub>tet</sub>                                                               | this study                       |
| pSEVA261_ribC                        | pSEVA261_P <sub>tet</sub> plasmid with <i>ribC</i> (EcoGene accession number: EG11406) and <i>mKate2</i> under control of a P <sub>tet</sub>                                                               | this study                       |
| pSEVA261_ribD                        | pSEVA261_P <sub>tet</sub> plasmid with <i>ribD</i> (EcoGene accession number: EG11321) and <i>mKate2</i> under control of a P <sub>tet</sub>                                                               | this study                       |
| pSEVA261_ribE                        | pSEVA261_P <sub>tet</sub> plasmid with <i>ribE</i> (EcoGene accession number: EG11322) and <i>mKate2</i> under control of a P <sub>tet</sub>                                                               | this study                       |
| pKO3                                 | Plasmid with <i>B. subtilis</i> gene <i>sacB</i> under control of a P <sub>const</sub>                                                                                                                     | 6                                |
| pSEVA431                             | pBR322 ori, streptomycin resistance                                                                                                                                                                        | pSEVA collection <sup>4</sup>    |
| pSEVA431_SacB                        | pSEVA431 plasmid with <i>sacB</i> under control of a P <sub>const</sub>                                                                                                                                    | this study                       |

Supplementary Table 3: Oligonucleotides used in this study.

| ID | Name            | Sequence (5' to 3') <sup>a</sup>                                                                   |
|----|-----------------|----------------------------------------------------------------------------------------------------|
| 1  | lacZ_RBS        | T*G*C*T*TCCGGCTCGTATGTTGTGTGGAATTGTGAGCGGATAACAATTT<br>CDDKGAGGAAACAGCTATGACCATGATTACGGATTCACTGGCC |
| 2  | lacZ_RBS_GLOS   | T*G*C*T*TCCGGCTCGTATGTTGTGTGGAATTGTGAGCGGATAACAATTT<br>CBDGGGWGAAACAGCTATGACCATGATTACGGATTCACTGGCC |
| 3  | ribA_RBS_GLOS   | C*C*C*T*TCTCGTTATGGCAAATAAGCCAATACAGAACCAGCAVABRGA<br>GGAGAATTTTCATGCAGCTTAAACGTGTGGCAGAAGCCAAACTG |
| 4  | ribB_RBS_GLOS   | A*A*A*A*GAGGAAAGTAGCGTCTGATTCATGGTABBTYCTCCTCACTAACT<br>GAGAATAAGCGGATTCACTATAACGCTAATGATTAGCGGCAG |
| 5  | ribA_GAGGGA     | C*C*C*T*TCTCGTTATGGCAAATAAGCCAATACAGAACCAGCAGAGAGA<br>GGAGAATTTTCATGCAGCTTAAACGTGTGGCAGAAGCCAAACTG |
| 6  | ribA_GAGAGA     | C*C*C*T*TCTCGTTATGGCAAATAAGCCAATACAGAACCAGCAGAGGGA<br>GGAGAATTTTCATGCAGCTTAAACGTGTGGCAGAAGCCAAACTG |
| 7  | ribA_CATAGA     | C*C*C*T*TCTCGTTATGGCAAATAAGCCAATACAGAACCAGCACATGGA<br>GGAGAATTTTCATGCAGCTTAAACGTGTGGCAGAAGCCAAACTG |
| 8  | ribA_AACAGA     | C*C*C*T*TCTCGTTATGGCAAATAAGCCAATACAGAACCAGCAAACAGA<br>GGAGAATTTTCATGCAGCTTAAACGTGTGGCAGAAGCCAAACTG |
| 9  | pCRISPR_lacZ_fw | [PHOS]AAACTGGAATTGTGAGCGGATAACAATTTTCACACG                                                         |
| 10 | pCRISPR_lacZ_rv | [PHOS]AAAAC GTGTGAAATTGTTATCCGCTCACAATTCCA                                                         |
| 11 | pCRISPR_ribA_fw | [PHOS]AAACAAAATAAGCCAATACAGAACCAGCATTATCG                                                          |
| 12 | pCRISPR_ribA_rv | [PHOS]AAAAC GATAATGCTGGTTCTGTATTGGCTTATTTT                                                         |
| 13 | pCRISPR_ribB_fw | [PHOS]AAACATCAACTCAGTTGAAAGCCCGCGAGCGCTTG                                                          |
| 14 | pCRISPR_ribB_rv | [PHOS]AAAACAAGCGCTCGCGGGCTTTCAACTGAGTTGAT                                                          |
| 15 | lacZ_RBS_rv     | TCATAGCTGTTTCCTGTGT                                                                                |
| 16 | ribA_RBS_rv     | GCTGCATGAAATTCTCCAGATAA                                                                            |
| 17 | ribB_rv         | ACACGTTTCGAAAGGCGTAC                                                                               |
| 18 | lacZ_RBS_fw     | GTTGGCCGATTCATTAATG                                                                                |
| 19 | ribA_RBS_fw     | ACTGCGGTACGTCTGG                                                                                   |
| 20 | ribB_fw         | TTGCTCAATTTTTTTCGGG                                                                                |
| 21 | lacZ_RBS_seq_rv | GGACGACGACAGTATC                                                                                   |
| 22 | ribA_RBS_seq_rv | GCTTCGAGCTGGAAGC                                                                                   |
| 23 | SacB_fw         | ATATATAAGCTTCACATATACCTGCCGTTCCAC                                                                  |
| 24 | SacB_rv         | ATATATGAATTCTTATTTGTTAACTGTTAATT                                                                   |
| 25 | Fill_up_lacZ    | GGCCAGTGAATCC                                                                                      |
| 26 | Fill_up_RibA    | CAGTTTGGCTTCTGC                                                                                    |
| 27 | Fill_up_RibB    | CTGCCGCTAATCAT                                                                                     |

<sup>a</sup> Phosphorothioated bases are indicated with an asterisk after the base.

Supplementary Table 4: **Different sequences of each RBS library and their predicted TIR and  $\Delta G$  of the secondary structure formed by the chemically synthesized oligonucleotide.** TIRs are predicted by the Salis RBS Calculator version 1.0 in the “Predict: RBS Library” mode <sup>7</sup>. No value for the TIR of RibB wt is given since the riboregulator affects the TIR. Folding energies ( $\Delta G$ ) of all oligonucleotides were calculated on the mFold web server <sup>8</sup>.

| LacZ N <sub>6</sub> -RedLibs |          |                                      | LacZ GLOS-RedLibs |          |                                      | RibA GLOS-RedLibs |          |                                      | RibB GLOS-RedLibs |          |                                      |
|------------------------------|----------|--------------------------------------|-------------------|----------|--------------------------------------|-------------------|----------|--------------------------------------|-------------------|----------|--------------------------------------|
| Sequence                     | TIR (AU) | $\Delta G$ (kcal mol <sup>-1</sup> ) | Sequence          | TIR (AU) | $\Delta G$ (kcal mol <sup>-1</sup> ) | Sequence          | TIR (AU) | $\Delta G$ (kcal mol <sup>-1</sup> ) | Sequence          | TIR (AU) | $\Delta G$ (kcal mol <sup>-1</sup> ) |
| wt                           | 731      |                                      | wt                | 732      |                                      | wt                | 3        |                                      | wt                | -        |                                      |
| GGTGAG                       | 916      | -4.33                                | GTGGGT            | 69       | -5.47                                | CATGGA            | 2358     | -10.54                               | AGAACG            | 2376     | -8.27                                |
| ATGGAG                       | 1104     | -7.03                                | GTGGGA            | 325      | -5.1                                 | AATGGA            | 5544     | -9.95                                | AGGACG            | 2845     | -9.18                                |
| GTTGAG                       | 1147     | -5.02                                | TGGGGT            | 340      | -5.47                                | GATGGA            | 7263     | -9.95                                | AGAAGC            | 4265     | -9.79                                |
| TGTGAG                       | 1256     | -5.41                                | CGGGGT            | 348      | -5.47                                | CATAGA            | 10743    | -8.49                                | AGAAGG            | 5845     | -8.20                                |
| GTGGAG                       | 1321     | -5.1                                 | CTGGGT            | 359      | -5.47                                | AAGAGA            | 11915    | -8.47                                | AGAAAG            | 6997     | -8.30                                |
| AGTGAG                       | 1510     | -6.05                                | CAGGGT            | 470      | -5.92                                | CAGAGA            | 11915    | -8.67                                | AGGAGG            | 10030    | -8.81                                |
| ATTGAG                       | 3379     | -4.68                                | TAGGGT            | 800      | -5.47                                | GAGAGA            | 13037    | -8.57                                | AGGAAG            | 13139    | -9.53                                |
| GATGAG                       | 3379     | -4.33                                | TTGGGT            | 821      | -5.47                                | GACAGA            | 13454    | -8.27                                | AGGAGC            | 15731    | -10.50                               |
| TGGGAG                       | 3868     | -4.69                                | GAGGGT            | 881      | -5.47                                | AACGGA            | 14265    | -8.37                                | AGAAGA            | 19701    | -8.20                                |
| TTTGAG                       | 4046     | -4.33                                | CGGGGA            | 1448     | -4.68                                | CACGGA            | 16327    | -8.27                                | AGAAAA            | 23586    | -8.20                                |
| AATGAG                       | 4046     | -4.57                                | TTGGGA            | 1880     | -4.75                                | GACGGA            | 18437    | -8.27                                | AGAAAC            | 23586    | -8.20                                |
| TATGAG                       | 7048     | -4.33                                | CTGGGA            | 1880     | -4.33                                | GATAGA            | 19285    | -8.27                                | AGAACA            | 23586    | -8.20                                |
| TTGGAG                       | 10955    | -4.33                                | GGGGGT            | 2441     | -5.47                                | CACAGA            | 22073    | -8.27                                | AGAACC            | 23586    | -8.20                                |
| TAGGAG                       | 11563    | -4.33                                | GGGGGA            | 3227     | -4.33                                | AAGGGA            | 22407    | -8.46                                | AGGAGA            | 25808    | -8.81                                |
| AGGGAG                       | 14351    | -4.65                                | GAGGGA            | 3375     | -4.33                                | AACAGA            | 25264    | -9.67                                | AGGAAA            | 27610    | -9.75                                |
| GGGGAG                       | 18800    | -4.33                                | CAGGGA            | 3898     | -5.38                                | AATAGA            | 31639    | -8.37                                | AGGACA            | 36992    | -8.81                                |
| AAGGAG                       | 19843    | -4.57                                | TGGGGA            | 4227     | -4.33                                | CAGGGA            | 38975    | -8.33                                | AGGACC            | 36992    | -8.81                                |
| GAGGAG                       | 28442    | -5.94                                | TAGGGA            | 9167     | -4.65                                | GAGGGA            | 40769    | -8.33                                | AGGAAC            | 42340    | -8.81                                |

Supplementary Table 5: **List of all off-target mutations in Ec<sup>+</sup>ribAB and Ec<sup>-</sup>ribAB** after four CRMAGE cycles and four CRMAGE and two MAGE cycles for deactivation of *mutS*, respectively. Three mutations (\*) occurred in the *mutS* deactivation step. Genome sequencing data were analyzed by breseq<sup>9</sup>, arrows indicate the orientation of the gene on the genome (→ plus strand and ← minus strand). If the mutation is between two genes (intergenic), both flanking genes are reported. If the gene does not code for a protein the entry in “aa change” is “noncoding”. Gene descriptions are taken from input GenBank files by breseq (Deatherage and Barrick).

| <b>Ec<sup>+</sup>ribAB</b> |                 |                  |                                  |                                                                                        |
|----------------------------|-----------------|------------------|----------------------------------|----------------------------------------------------------------------------------------|
| <b>Position</b>            | <b>Mutation</b> | <b>aa change</b> | <b>Gene</b>                      | <b>Description</b>                                                                     |
| 158,933                    | A→G             | V54A             | <i>pcnB</i> ←                    | poly(A) polymerase I                                                                   |
| 1,588,170                  | C→T             | intergenic       | <i>b1505</i> ← / ← <i>b15 06</i> | putative outer membrane protein, hypothetical protein                                  |
| 3,636,556                  | G→A             | A298T            | <i>pitA</i> →                    | low-affinity phosphate transport                                                       |
| 4,164,808                  | G→T             | noncoding        | <i>rrsB</i> →                    | 16S ribosomal RNA                                                                      |
| <b>Ec<sup>-</sup>ribAB</b> |                 |                  |                                  |                                                                                        |
| <b>Position</b>            | <b>Mutation</b> | <b>aa change</b> | <b>Gene</b>                      | <b>Description</b>                                                                     |
| 53,484                     | A→G             | S407P            | <i>surA</i> ←                    | survival protein                                                                       |
| 74,110                     | C→T             | G138S            | <i>yabK</i> ←                    | putative transport system permease protein                                             |
| 119,651                    | A→C             | D124A            | <i>ampE</i> →                    | regulates <i>ampC</i>                                                                  |
| 123,331                    | C→T             | G105G            | <i>aceE</i> →                    | pyruvate dehydrogenase (decarboxylase component)                                       |
| 157,118                    | T→C             | intergenic       | <i>yadN</i> ←/← <i>folK</i>      | putative fimbrial-like protein/<br>7,8-dihydro-6-hydroxymethylpterin-pyrophosphokinase |
| 158,672                    | C→T             | G141D            | <i>pcnB</i> ←                    | poly(A) polymerase I                                                                   |
| 166,050                    | A→G             | T441A            | <i>mrcB</i> →                    | peptidoglycan synthetase;<br>penicillin-binding protein 1B                             |
| 182,555                    | C→T             | A37A             | <i>cdaR</i> →                    | regulator of D-galactarate, D-glucarate and D-glycerate metabolism                     |
| 204,986                    | A→G             | Y165C            | <i>rnhB</i> →                    | RNAse HII, degrades RNA of DNA-RNA hybrids                                             |
| 273,119                    | T→C             | V345A            | <i>ykfC</i> →                    | hypothetical protein                                                                   |
| 280,733                    | G→A             | R159C            | <i>yagA</i> ←                    | hypothetical protein                                                                   |
| 320,783                    | G→A             | intergenic       | <i>ykgD</i> →/→ <i>ykgE</i>      | putative ARAC-type regulatory protein/putative dehydrogenase subunit                   |
| 347,141                    | A→G             | I176T            | <i>prpR</i> ←                    | regulator for <i>prp</i> operon                                                        |
| 512,101                    | C→T             | T101M            | <i>ybaT</i> →                    | putative amino acid/amine transport protein                                            |
| 543,006                    | A→G             | S89P             | <i>ylbA</i> ←                    | hypothetical protein                                                                   |
| 664,168                    | C→T             | L82L             | <i>rlpA</i> ←                    | a minor lipoprotein                                                                    |
| 703,366                    | A→G             | D67G             | <i>nagE</i> →                    | PTS system, N-acetylglucosamine-specific enzyme IIABC                                  |
| 834,779                    | T→C             | I103I            | <i>ybiB</i> →                    | putative enzyme                                                                        |
| 900,961                    | C→T             | V171V            | <i>artQ</i> ←                    | arginine 3 <sup>rd</sup> transport system permease protein                             |
| 1,113,039*                 | A→G             | D123D            | <i>msyB</i> ←                    | acidic protein suppresses mutants lacking function of protein export                   |
| 1,136,623                  | T→C             | S10S             | <i>flgJ</i> →                    | flagellar biosynthesis                                                                 |
| 1,191,766                  | T→C             | H30R             | <i>yfcC</i> ←                    | hypothetical protein                                                                   |
| 1,275,414                  | A→G             | F476F            | <i>narX</i> ←                    | nitrate/nitrate sensor, histidine protein kinase acts on NarL regulator                |

|            |                           |            |                             |                                                                                          |
|------------|---------------------------|------------|-----------------------------|------------------------------------------------------------------------------------------|
| 1,333,276  | G→A                       | intergenic | <i>cysB</i> →/→ <i>acnA</i> | positive transcriptional regulator for cysteine regulon/aconitate hydratase 1            |
| 1,346,830  | A→G                       | L36P       | <i>rnb</i> ←                | RNase II, mRNA degradation                                                               |
| 1,374,703  | A→G                       | S219G      | <i>ycjR</i> →               | hypothetical protein                                                                     |
| 1,416,937* | A→G                       | L122L      | <i>sieB</i> →               | phage superinfection exclusion protein                                                   |
| 1,536,890  | T→C                       | Q1242R     | <i>narZ</i> ←               | cryptic nitrate reductase 2 alpha subunit                                                |
| 1,554,862  | G→A                       | G72R       | <i>osmC</i> →               | osmotically inducible protein                                                            |
| 1,620,820  | G→A                       | intergenic | <i>ydeE</i> →/← <i>ydeH</i> | putative transport protein/orf, hypothetical protein                                     |
| 1,894,197  | G→A                       | E2K        | <i>yeaB</i> →               | hypothetical protein                                                                     |
| 1,898,742  | T→C                       | N290D      | <i>yoaE</i> ←               | putative transport protein                                                               |
| 1,906,040  | (A) <sub>7→8</sub>        | intergenic | <i>yobF</i> ←/← <i>yebO</i> | hypothetical protein/hypothetical protein                                                |
| 2,086,286  | C→T                       | A6A        | <i>yeeY</i> ←               | putative transcriptional regulator<br>LYSR-type                                          |
| 2,102,024  | repeat<br>region +9<br>bp | coding     | <i>wbbK</i> ←               | putative glucose transferase                                                             |
| 2,503,109  | A→G                       | V154A      | <i>ypdE</i> ←               | hypothetical protein                                                                     |
| 2,602,988  | C→T                       | A52A       | <i>hyfD</i> →               | hydrogenase 4 membrane subunit                                                           |
| 2,757,357  | (A) <sub>8→9</sub>        | coding     | <i>yfjI</i> →               | hypothetical protein                                                                     |
| 2,768,789  | A→G                       | K112K      | <i>yfjS</i> →               | hypothetical protein                                                                     |
| 2,770,160  | A→G                       | I6T        | <i>yfjU</i> ←               | hypothetical protein                                                                     |
| 2,816,972  | A→G                       | intergenic | <i>serV</i> ←/← <i>csrA</i> | tRNA-Ser/carbon storage regulator                                                        |
| 3,076,675  | A→G                       | G69G       | <i>cmtA</i> ←               | PTS system, mannitol-specific enzyme II<br>component, cryptic                            |
| 3,081,206  | T→C                       | N205S      | <i>speB</i> ←               | agmatinase                                                                               |
| 3,165,071  | T→C                       | T224A      | <i>ygiS</i> ←               | putative transport periplasmic protein                                                   |
| 3,204,250  | T→C                       | D10G       | <i>ygiP</i> ←               | putative transcriptional regulator<br>LYSR-type                                          |
| 3,303,854  | A→G                       | intergenic | <i>mtr</i> ←/← <i>deaD</i>  | tryptophan-specific transport<br>protein/inducible ATP-independent RNA<br>helicase       |
| 3,359,337  | T→C                       | V47A       | <i>gltF</i> →               | regulator of <i>gltBDF</i> operon, induction of Ntr<br>enzymes                           |
| 3,441,036  | T→C                       | T362A      | <i>prlA</i> ←               | putative ATPase subunit of translocase                                                   |
| 3,823,370  | T→A                       | D46E       | <i>recG</i> →               | DNA helicase, resolution of Holliday<br>junctions, branch migration                      |
| 4,047,248  | C→T                       | R754C      | <i>polA</i> →               | DNA polymerase I                                                                         |
| 4,047,374  | C→T                       | P796S      | <i>polA</i> →               | DNA polymerase I                                                                         |
| 4,317,108  | C→T                       | P174P      | <i>phnJ</i> ←               | phosphonate metabolism                                                                   |
| 4,380,567  | (T) <sub>7→6</sub>        | intergenic | <i>frdA</i> ←/→ <i>yjeA</i> | fumarate reductase, anaerobic,<br>flavoprotein subunit/putative lysyl-tRNA<br>synthetase |
| 4,455,398  | G→A                       | P164L      | <i>yjgA</i> ←               | putative alpha helix protein                                                             |
| 4,548,135  | A→G                       | G395G      | <i>gntP</i> ←               | gluconate transport system permease 3                                                    |
| 4,581,282* | T→C                       | E1186G     | <i>hsdR</i> ←               | host restriction; endonuclease R                                                         |
| 4,637,628  | A→G                       | G234G      | <i>arcA</i> ←               | negative response regulator of genes in<br>aerobic pathways, (sensors, ArcB and<br>CpxA) |

Supplementary Figures:

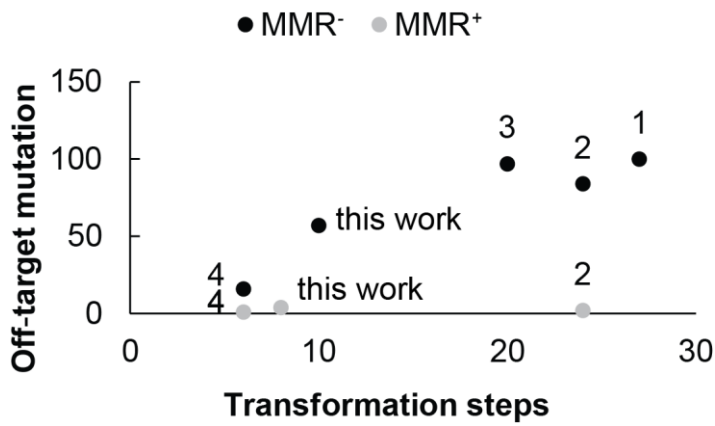

Supplementary Figure 1: **Genomic off-target mutations introduced by MAGE** observed in different MAGE projects taken from literature: 1: <sup>10</sup>; 2: <sup>11</sup>; 3: <sup>12</sup> and 4: <sup>13</sup> in MMR<sup>-</sup> (black) and MMR<sup>+</sup> (grey), each MAGE cycle is counted as one transformation step. For our work transformation steps are either plasmid or oligonucleotide transformation for Ec<sup>-</sup>ribAB or Ec<sup>+</sup>ribAB (four oligonucleotide and four plasmid transformation or six and four, respectively). For Ec<sup>-</sup>ribAB two additional step were required to deactivate *mutS* by introduction of an early STOP codon).



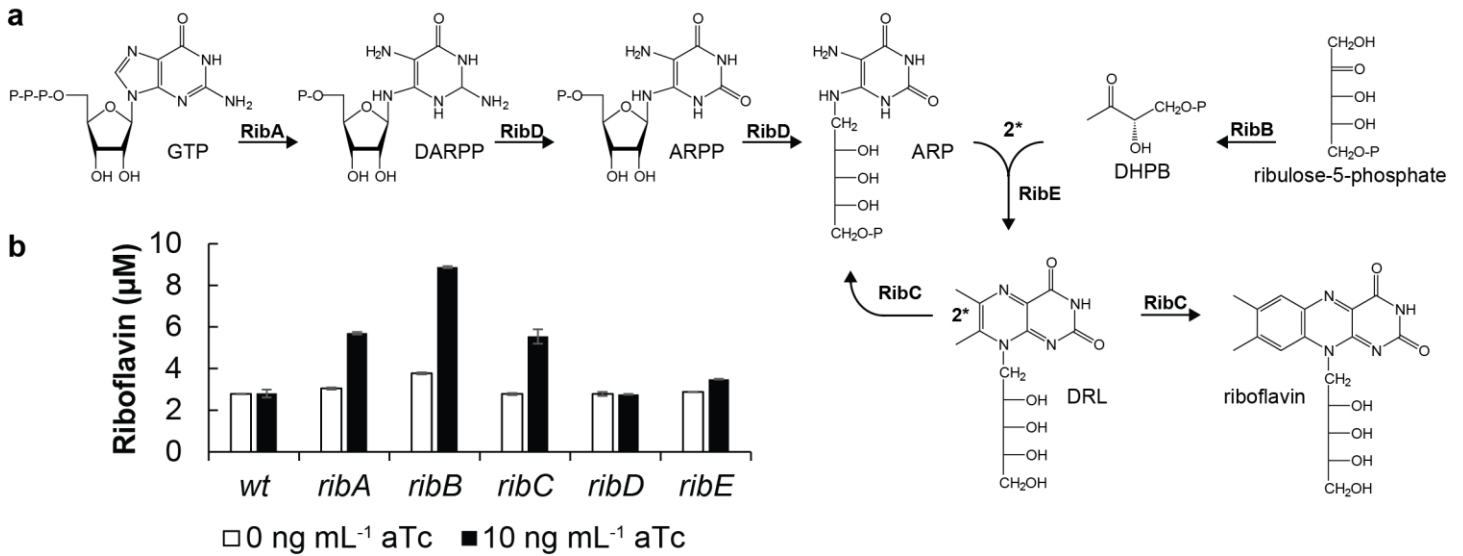

Supplementary Figure 2. **Riboflavin production** (a) Pathway of riboflavin synthesis in *E. coli* and involved enzymes. GTP: Guanosine 5'-triphosphate; DARPP: 2,5-Diamino-6-(5-phospho-D-ribosylamino)pyrimidin-4(3H)-one; ARPP: 5-Amino-6-(5'-phosphoribosylamino)uracil; ARP: 5-amino-6-(5'-phospho-D-ribitylamino)uracil; DHPB: L-3,4-dihydroxybutan-2-one 4-phosphate DRL: 6,7-dimethyl-8-(D-ribityl)lumazine. (b) Riboflavin production after 24 h at 30°C in the wildtype strain *E. coli* BW23474 carrying an empty expression plasmid (wt) and after plasmid-based overexpression of single riboflavin genes after induction with 0 (white) or 10 ng mL<sup>-1</sup> (black) of anhydrotetracyclin (aTc). Note that in this setup all *rib* genes are also present and functional at their endogenous chromosomal locus. Values are mean (n = 3) ± standard deviation.

**a** N<sub>6</sub>-RedLibs *lacZ* libraries

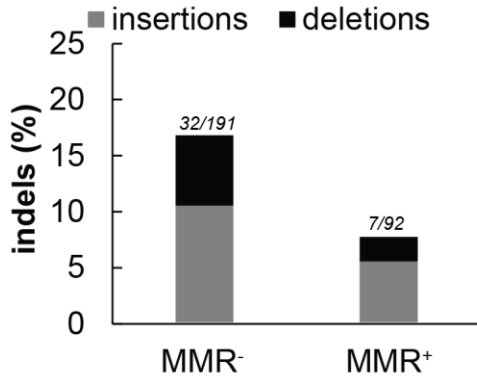

**b** GLOS-RedLibs libraries

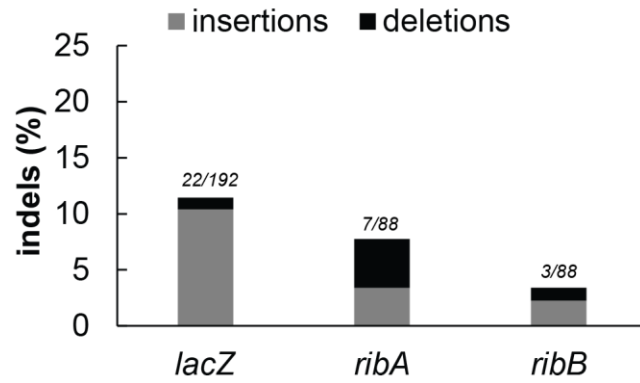

Supplementary Figure 3. **Indels found within the oligonucleotide-covered sequences after genome editing.** Fraction of all library members which have an insertion (grey) or deletion (black) on the genome within the 90 bp oligonucleotide sequence. **(a)** Comparison of the N<sub>6</sub>-RedLibs *lacZ* library in an MMR<sup>-</sup> and MMR<sup>+</sup> strain. **(b)** Analysis of the GLOS-RedLibs libraries. Frequencies were determined by Sanger sequencing. Numbers indicate absolute numbers, mutants with indels/total. Wild type sequences were excluded from the analysis.

**a** RBS *lacZ* (N<sub>6</sub>-RedLibs)

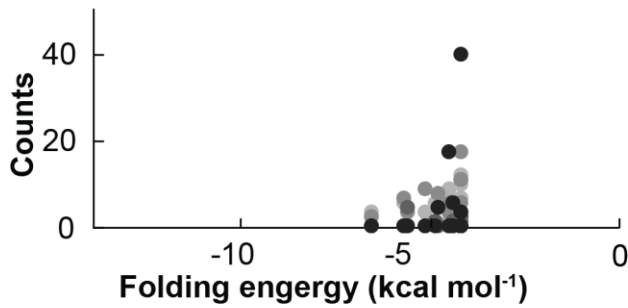

**b** RBS *lacZ* (GLOS-RedLibs)

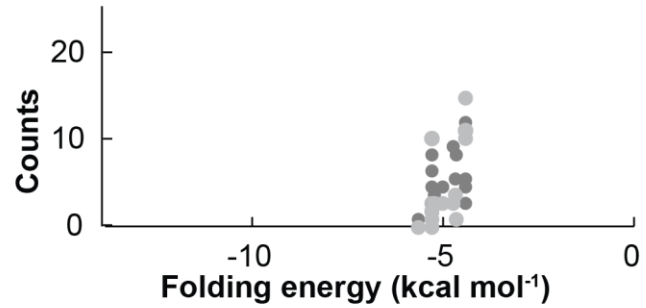

**c** RBS *ribA* (GLOS-RedLibs)

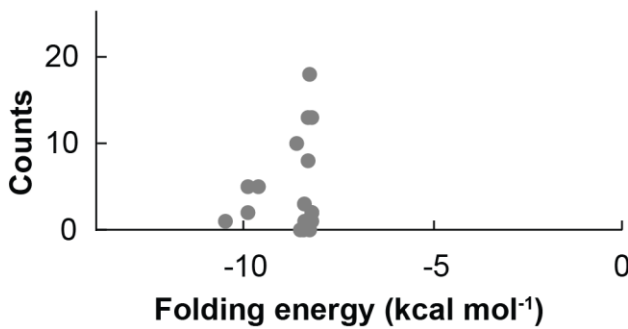

**d** RBS *ribB* (GLOS-RedLibs)

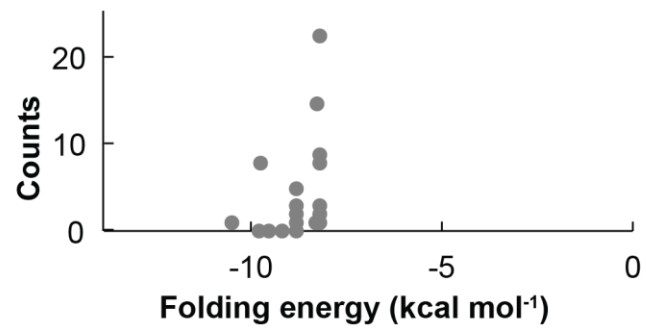

Supplementary Figure 4. **Folding energies ( $\Delta G$ ) of all chemically synthesized oligonucleotides present in RBS libraries and their occurrence after genome editing.** Folding energies were calculated (mFold web server<sup>8</sup>) for each of the 18 members of each library and are plotted against the frequency with which a strain was found that had acquired the corresponding change in RBS. Note that those library members for which no corresponding strain could be identified have the count “0”. **(a)** Data for the *lacZ* (N<sub>6</sub>-RedLibs) library, two experiments in MMR<sup>+</sup> and two experiments in MMR<sup>-</sup> strains. Different shades of grey refer to the four different experiments. Compare also Fig. 2a **(b)** Data for the *lacZ* (GLOS-RedLibs) library, two experiments in MMR<sup>+</sup> strain. Different shades indicate the different libraries displayed in Fig. 2abd. **(c)** Data for the *ribA* (GLOS-RedLibs) library, see Fig. 3b. **(d)** Data for *ribB* (GLOS-RedLibs) library see Fig. 4b.

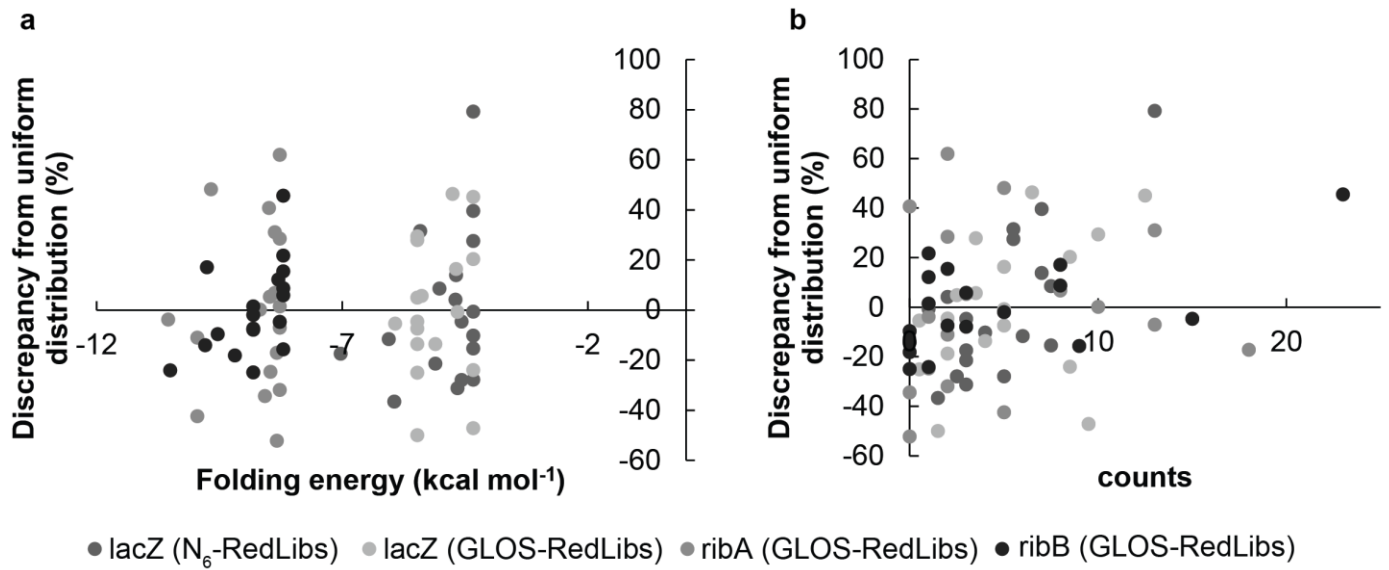

Supplementary Figure 5. **Aspects of sequence distribution.** Relation between the deviation of the abundance a specific oligonucleotide after chemical synthesis from uniform distribution and a) the folding energy ( $\Delta G$ ) of the corresponding chemically synthesized oligonucleotide and (b) the occurrence of the corresponding sequence after genome editing.

## Additional references

1. Haldimann, A. & Wanner, B. L. Conditional-replication, integration, excision, and retrieval plasmid-host systems for gene structure-function studies of bacteria. *J. Bacteriol.* **183**, 6384–6393 (2001).
2. Wang, H. H. *et al.* Programming cells by multiplex genome engineering and accelerated evolution. *Nature* **460**, 894–898 (2009).
3. Jiang, W., Bikard, D., Cox, D., Zhang, F. & Marraffini, L. A. RNA-guided editing of bacterial genomes using CRISPR-Cas systems. *Nat. Biotechnol.* **31**, 233–239 (2013).
4. Silva-Rocha, R. *et al.* The Standard European Vector Architecture (SEVA): A coherent platform for the analysis and deployment of complex prokaryotic phenotypes. *Nucleic Acids Res.* **41**, 666–675 (2013).
5. Bosshart, A., Hee, C. S., Bechtold, M., Schirmer, T. & Panke, S. Directed divergent evolution of a thermostable D -tagatose epimerase towards improved activity for two hexose substrates. *ChemBioChem* **16**, 592–601 (2015).
6. Link, A. J. & Phillips, D. Methods for generating precise deletions and insertions in the genome of wild-type *Escherichia coli*: application to open reading frame characterization. **179**, 6228–6237 (1997).
7. Salis, H. M. The ribosome binding site calculator. *Methods Enzymol.* **498**, 19–42 (2011).
8. Zuker, M. Mfold web server for nucleic acid folding and hybridization prediction. *Nucleic Acids Res.* **31**, 3406–3415 (2003).
9. Deatherage, D. E. & Barrick, J. E. Identification of mutations in laboratory-evolved microbes from next-generation sequencing data using breseq. *Methods Protoc. Methods Mol. Biol.* **1151**, 165–188 (2014).
10. Isaacs, F. J. *et al.* Precise manipulation of chromosomes *in vivo* enables genome-wide codon replacement. *Science* **333**, 348–353 (2011).
11. Nyerges, Á. *et al.* A highly precise and portable genome engineering method allows comparison of mutational effects across bacterial species. *Proc. Natl. Acad. Sci.* **113**, 2502–2507 (2016).
12. Nyerges, Á. *et al.* Conditional DNA repair mutants enable highly precise genome engineering. *Nucleic Acids Res.* **42**, e62 (2014).
13. Lennen, R. M. *et al.* Transient overexpression of DNA adenine methylase enables efficient and mobile genome engineering with reduced off-target effects. *Nucleic Acids Res.* **44**, e36–e36 (2016).
